# Supplementary material
Source: HighWire-hosted journal article supplement (https://gh.bmj.com/content/7/10/e010421)
Supplement: inline-supplementary-material-1 [file inline-supplementary-material-1.pdf]

**Supplemental Table 1.** Comparison of journal characteristics for global health specialty journals with and without authorship policy statements for the inclusion of authors affiliated with LMICs (N=45).

|                                                            | <b>Authorship Policy,<br/>n (%), N=11</b> | <b>No Authorship Policy,<br/>n (%), N=34</b> | <b>P value*</b> |
|------------------------------------------------------------|-------------------------------------------|----------------------------------------------|-----------------|
| Headquarters in the United States (n=15)                   | 2 (18.2%)                                 | 13 (38.2%)                                   | 0.29            |
| Headquarters in the United Kingdom (n=11)                  | 5 (45.5%)                                 | 6 (17.7%)                                    | 0.10            |
| Headquarters in High-Income Country (n=41)                 | 11 (100%)                                 | 30 (88.2%)                                   | 0.56            |
| Established after 2015 (n=13)                              | 4 (36.4%)                                 | 9 (26.5%)                                    | 0.70            |
| Established after 2010 (n=31)                              | 6 (54.6%)                                 | 25 (73.5%)                                   | 0.28            |
| Established after 2000 (n=39)                              | 10 (90.9%)                                | 29 (85.3%)                                   | 1.00            |
| Impact factor>5 (n=4)                                      | 3 (27.3%)                                 | 1 (2.9%)                                     | 0.04            |
| Impact factor>3 (n=10)                                     | 5 (45.5%)                                 | 5 (14.7%)                                    | 0.048           |
| Open Access Journal (n=39)                                 | 10 (90.9%)                                | 29 (85.3%)                                   | 1.00            |
| Article Processing Charges (n=33)                          | 8 (72.7%)                                 | 25 (73.5%)                                   | 1.00            |
| Article Processing Charge Discount (n=29)                  | 7 (63.6%)                                 | 22 (64.7%)                                   | 1.00            |
| >20% of Editorial Board Staff Affiliated with LMICs (n=14) | 4 (36.4%)                                 | 10 (29.4%)                                   | 0.72            |

\*All comparisons were made using the Fisher exact test.
